# Supplementary material for: TRAF6 function as a novel co-regulator of Wnt3a target genes in prostate cancer
Source: PubMed Central journal article supplement — eBioMedicine. 2019 Jun 28;45:192–207. doi: 10.1016/j.ebiom.2019.06.046 (PMC6642315; doi:10.1016/j.ebiom.2019.06.046), 2019-06-28
Supplement: mmc1.pdf [file mmc1.pdf]

# Supplementary Figure 1

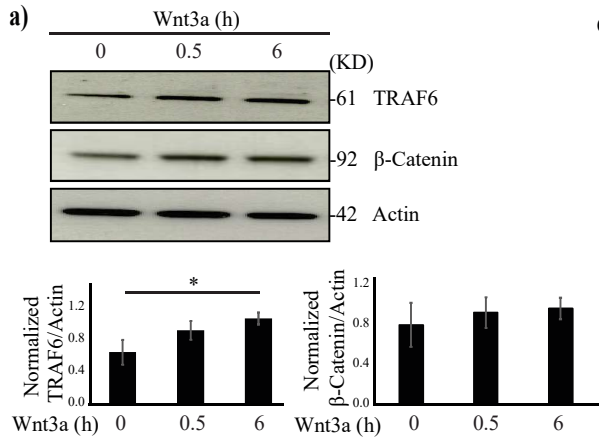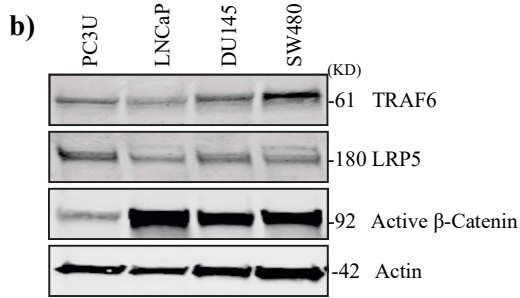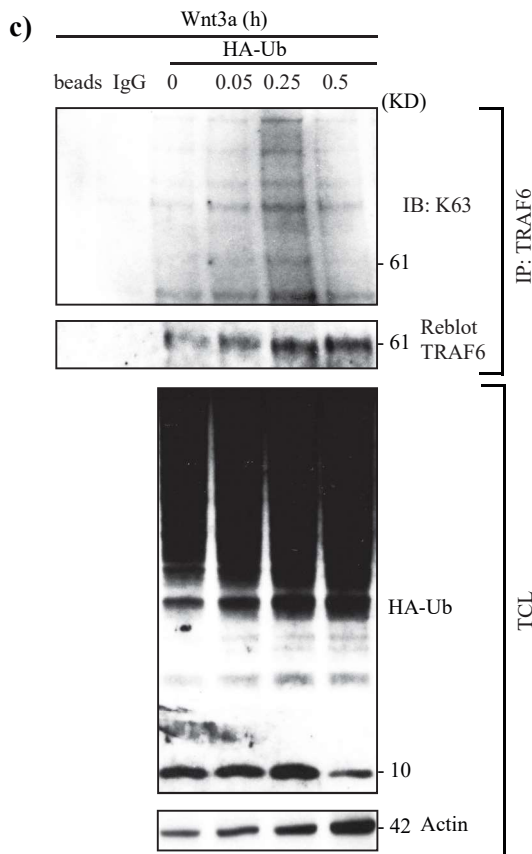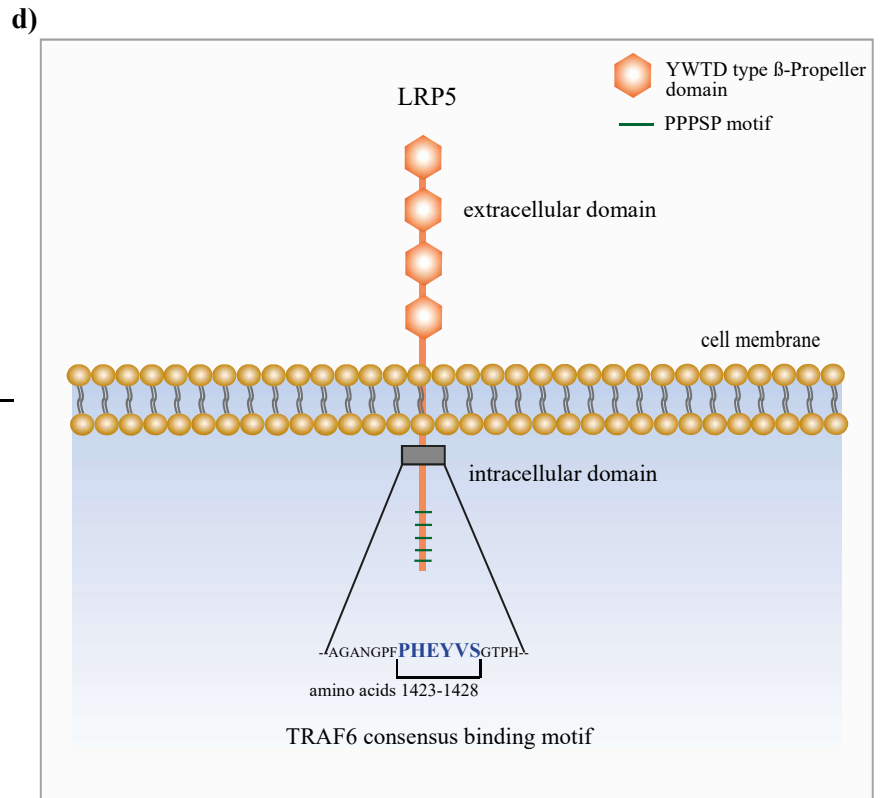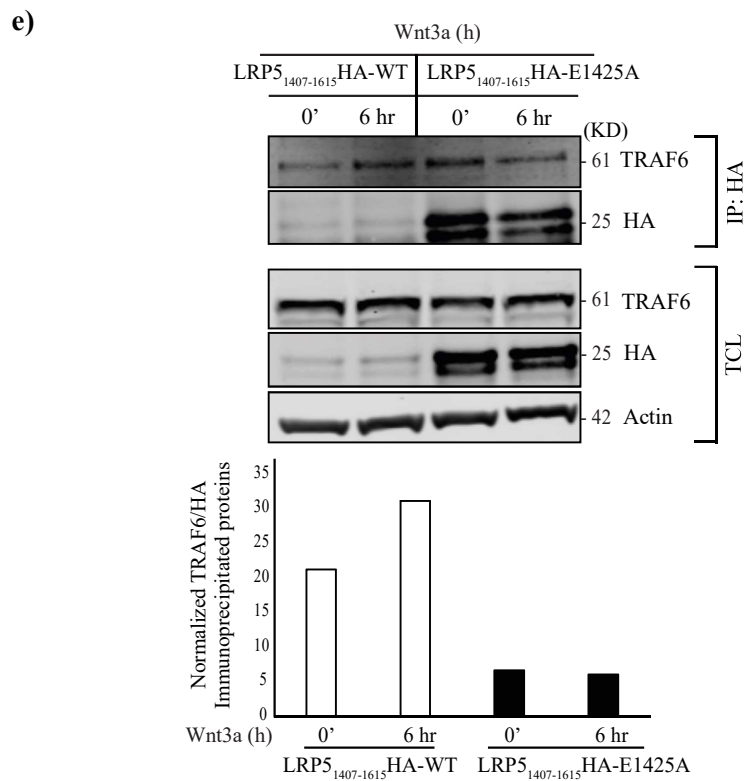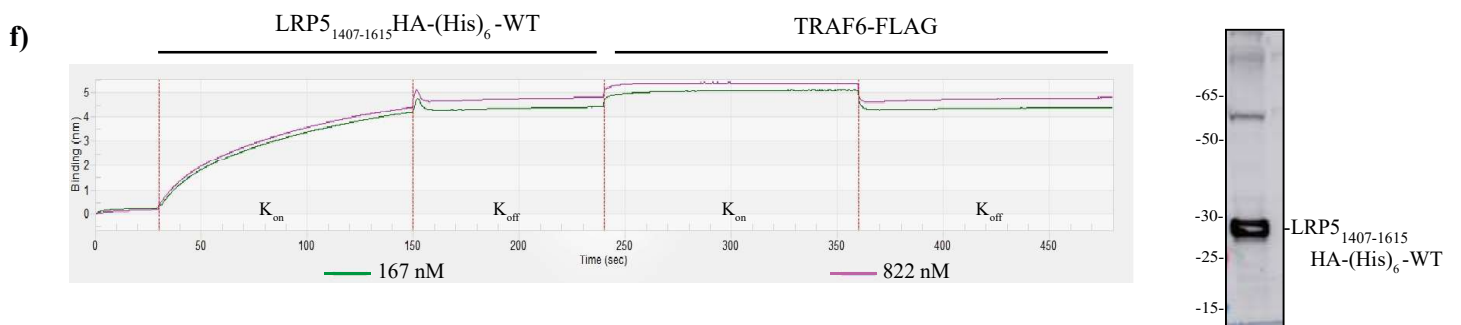

# Supplementary Figure 2

a)

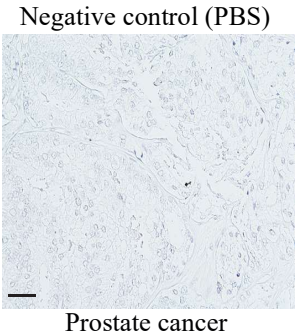

b)

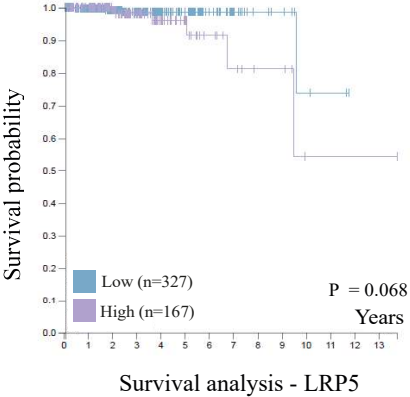

c)

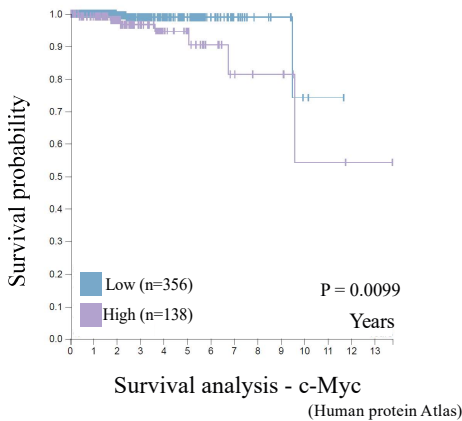

# Supplementary Figure 3

a)

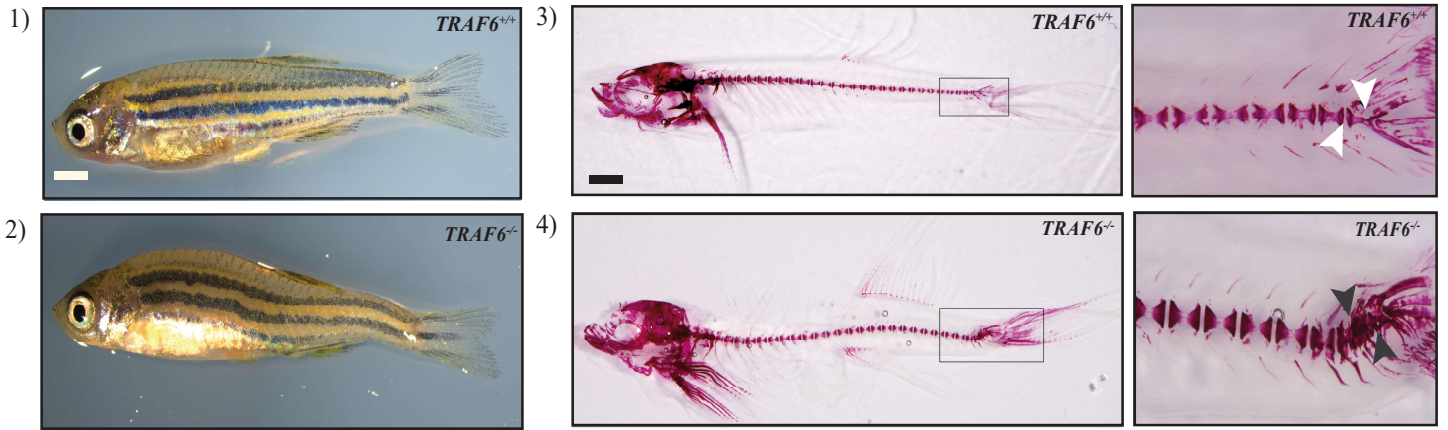

(b)

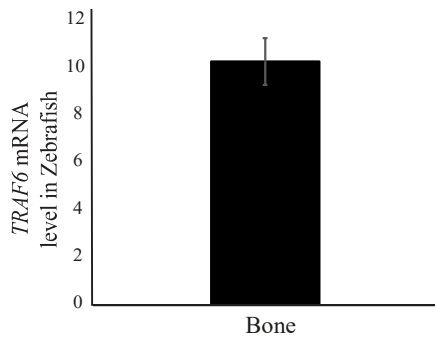

## Supplementary figure 4

### List of Primers

#### Primers for Human prostate cancer cell line (PC3U) mRNA qRT-PCR analysis

| gene             | Forward Primers        | Reverse Primer         |
|------------------|------------------------|------------------------|
| TRAF6            | GTTGCTGAAATCGAAGCACA   | CGGGTTTGCCAGTGTAGAAT   |
| $\beta$ -Catenin | CCAATAGGGGCACAAAACGT   | CCTCTTCCCCATCTCTGTCA   |
| LRP5             | ACGTCAGCCTGAAGACCATC   | GCGCCACTTCGATTCTGTTG   |
| c-Myc            | CTTCTCTGAAAGGCTCTCCTTG | GTCGAGGTCATAGTTCCTGTTG |
| GAPDH            | CTCTGGTAAAGTGGATATTGT  | GGTGGAATCATATTGGAACA   |

#### Primers for zebrafish mRNA qRT-PCR analysis

| gene                               | Forward Primers      | Reverse Primer          |
|------------------------------------|----------------------|-------------------------|
| <i><math>\beta</math>-Catenin1</i> | CCATTGGCAGCAACAGTCTT | GAAGGACTGGTTGAAGCCCT    |
| <i><math>\beta</math>-Catenin2</i> | CCATGGAGCAGGACCGTAA  | CCTGCTCCCACTCGTACAG     |
| <i>LRP5</i>                        | AGTAGGACGAGCAAACGGAC | GATCTCTCGCTGTAGACTTTGC  |
| <i>Cyclin D1</i>                   | TTGTTTTGCTGCGAAGTGGA | TCGCGACGATTTTCCTCATT    |
| <i>CBX8a</i>                       | GAATATTCTGGATGAGCGTC | GCTTTTGCCTTCATTAGAAAC   |
| <i>CBX8b</i>                       | CCACAGGACTAATCCACAAT | TGAATAGTGCTTCAGGTGTT    |
| <i>MSXd</i>                        | AGTTTGGTCAGAGGAGAAAT | CTTGTGGAGTCTTGAGAGAA    |
| <i><math>\beta</math>-Actin</i>    | CGAGCTGTCTTCCCATCCA  | TCACCAACGTAGCTGTCTTTCTG |
